# Supplementary material
Source: HighWire-hosted journal article supplement (https://erj.ersjournals.com/content/54/3/1901276)
Supplement: inline-supplementary-material-1 [file inline-supplementary-material-1.pdf]

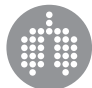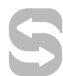

SHAREABLE PDF

AGORA

CORRESPONDENCE

ERJ European Respiratory Journal Eur Respir J 0903-1936/1399-3003 European Respiratory Society 10.1183/13993003.01276-2019 ERJ-01276-2019 AGORA CORRESPONDENCE Inhaled corticosteroids and pneumonia mortality in COPD patients CORRESPONDENCE CORRESPONDENCE Inhaled corticosteroids and pneumonia mortality in COPD

Suissa Samy,

Center for Clinical Epidemiology, Lady Davis Institute, Jewish General Hospital, and the Depts of Epidemiology and Biostatistics and of Medicine, McGill University, Montreal, QC, Canada.

**Correspondence:** Samy Suissa, Centre for Clinical Epidemiology, Jewish General Hospital, 3755 Cote Ste-Catherine, Montreal, QC, Canada H3T 1E2. E-mail: samy.suissa@mcgill.ca  
2019201954026062019270620192019

*From the authors:*
